# Supplementary material for: Mitogenomic Analysis of Pterioidea (Bivalvia: Pteriomorphia): Insights into the Evolution of the Gene Rearrangements
Source: MDPI journal article supplement (doi:10.3390/fishes8100528), 2023-10-23

**Table S1.** List of species used in this study.

| <b>Infraclass</b> | <b>Order</b> | <b>Family</b>   | <b>Species</b>                    | <b>Length (bp)</b> | <b>Gebank</b> |
|-------------------|--------------|-----------------|-----------------------------------|--------------------|---------------|
| Pteriomorpha      | Arcida       | Arcidae         | <i>ANadara broughtonii</i>        | 44333              | OM807131      |
|                   |              |                 | <i>Tegillarca granosa</i>         | 31589              | KJ607173      |
|                   |              | Cucullaeidae    | <i>Cucullaea labiata</i>          | 25845              | KP091889      |
|                   | Mytilida     | Mytilidae       | <i>Perna perna</i>                | 18415              | KM655841      |
|                   |              |                 | <i>Bathymodiolus septemdierum</i> | 17069              | AP014562      |
|                   |              |                 | <i>Mytilus galloprovincialis</i>  | 16744              | DQ399833      |
|                   |              |                 | <i>Mytilus trossulus</i>          | 18652              | AY823625      |
|                   |              |                 |                                   |                    |               |
|                   | Ostreida     | Ostreidae       | <i>Crassostrea hongkongensis</i>  | 18617              | MZ337404      |
|                   |              |                 | <i>Crassostrea ariakensis</i>     | 18414              | FJ841964      |
|                   |              |                 | <i>Crassostrea gigas</i>          | 18224              | MZ497416      |
|                   |              |                 | <i>Saccostrea cucullata</i>       | 16396              | KP769562      |
|                   |              | Pinnidae        | <i>Atrina pectinata</i>           | 16811              | KC153059      |
|                   |              |                 | <i>Pinna rudis</i>                | 18264              | LC634517      |
|                   |              | Isognomnidae    | <i>Isognomon bicolor</i>          | 25122              | OP095038      |
|                   |              |                 | <i>Isognomon nucleus</i>          | 33662              | ON722380      |
|                   |              |                 | <i>Isognomon alatus</i>           | 30636              | OP067230      |
|                   |              | Margaritidae    | <i>Pinctada albina</i>            | 23841              | OR529434      |
|                   |              |                 | <i>Pinctada imbricata</i>         | 31435              | KX669229      |
|                   |              |                 | <i>Pinctada margaritifera</i>     | 15556              | OR529435      |
|                   |              |                 | <i>Pinctada maxima</i>            | 16994              | GQ452847      |
|                   |              | Pteriidae       | <i>Pteria penguin</i>             | 17344              | KU552127      |
|                   | Pectinida    | Pectinidae      | <i>Argopecten irradians</i>       | 16221              | DQ665851      |
|                   |              |                 | <i>Argopecten purpuratus</i>      | 16266              | KF601246      |
|                   |              |                 | <i>Chlamys farreri</i>            | 20889              | EF473269      |
|                   |              | Propeamussiidae | <i>Catillopecten sp</i>           | 17979              | OQ434059      |
|                   |              |                 | <i>Propeamussium sp</i>           | 18132              | OM038107      |
| Heteroconchia     |              | Vesicomysidae   | <i>Archivesica marissinica</i>    | 17374              | MK948426      |
|                   |              | Cardiidae       | <i>Tridacna squamosa</i>          | 20930              | KP205428      |

**Table S2.** Best fit partitions and substitution models.

|                                                 | Set Partition (Conducted<br>by PartitionFinder 2) | Best Model for BI and<br>ML (Selected by<br>PartitionFinder 2) |
|-------------------------------------------------|---------------------------------------------------|----------------------------------------------------------------|
| Best Partition<br>CDS genes<br>(BIC= 505451.10) | Atp6 1th                                          | TRN+I+G                                                        |
|                                                 | Atp6 2th                                          | TVM+I+G                                                        |
|                                                 | Atp6 3th                                          | TRN+G                                                          |
|                                                 | Cox1-2-3 1th                                      | GTR+I+G                                                        |
|                                                 | Cox1-2-3 2th                                      | GTR+I+G                                                        |
|                                                 | Cox1-2-3 3th                                      | TIM+G                                                          |
|                                                 | Cytb 1th                                          | HKY+I+G                                                        |
|                                                 | Cytb 2 th                                         | TVM+I+G                                                        |
|                                                 | Cytb 3 th                                         | TRN+G                                                          |
|                                                 | Nad1-2-3-4-4L-5-6 1th                             | GTR+I+G                                                        |
|                                                 | Nad1-2-3-4-4L-5-6 2th                             | GTR+I+G                                                        |
|                                                 | Nad1-2-3-4-4L-5-6 3th                             | TRN+G                                                          |
| Best Partition<br>rRNA genes<br>(BIC= 53439.43) | rrnS                                              | GTR+G                                                          |
|                                                 | rrnL                                              | GTR+I+G                                                        |

**Figure S1.** Relative synonymous codon usage (RSCU) of mitochondrial genome of *P. albina* (Left column for each amino acid) and *P. margaritifera* (Right column for each amino acid).

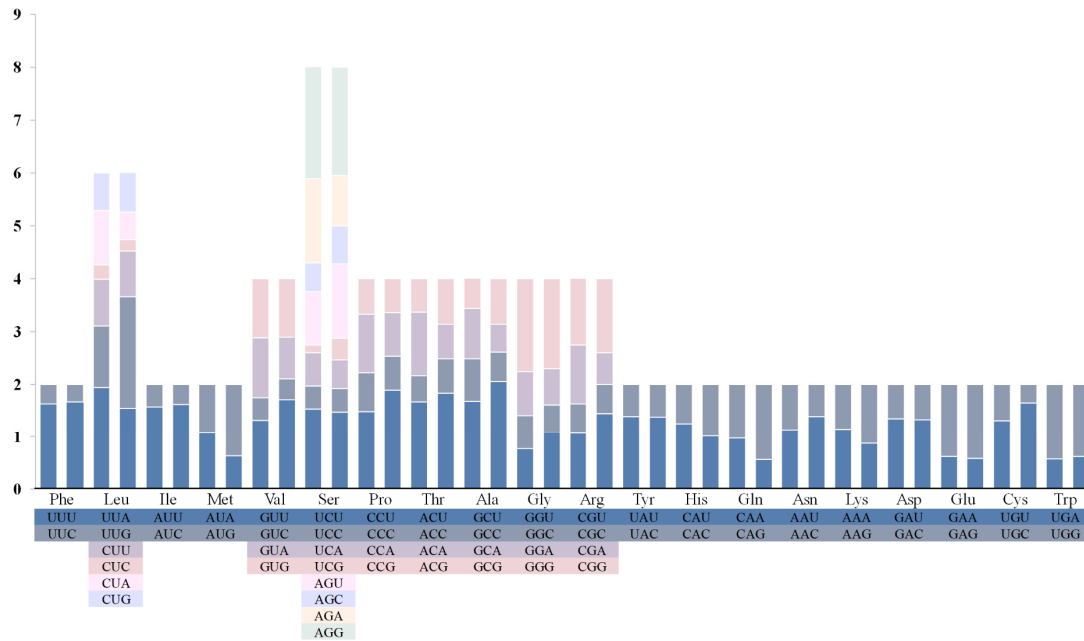

Supplement: s1 [file s1]
